# Supplementary material
Source: MDPI journal article supplement (https://www.mdpi.com/2071-1050/14/7/4373)
Supplement: s1 [file s1]

## Supplementary Materials:

**Table S1.** Resident Population—Bragança Parishes

| Parish                                                  | 2021  | 2011  | 2001  |
|---------------------------------------------------------|-------|-------|-------|
| Babe                                                    | 209   | 238   | 277   |
| Baçal                                                   | 460   | 484   | 470   |
| Carragosa                                               | 162   | 190   | 260   |
| Castro de Avelãs                                        | 430   | 460   | 483   |
| Donai                                                   | 418   | 446   | 416   |
| Espinhosela                                             | 227   | 244   | 304   |
| França                                                  | 199   | 238   | 275   |
| Gimonde                                                 | 360   | 341   | 386   |
| Gondesende                                              | 139   | 194   | 226   |
| Parâmio                                                 | 195   | 214   | 281   |
| Quintanilha                                             | 217   | 216   | 304   |
| Rabal                                                   | 153   | 171   | 196   |
| União das freguesias de Aveleda e Rio de Onor           | 227   | 272   | 379   |
| União das freguesias de Castrelos e Carrazedo           | 215   | 241   | 332   |
| União das freguesias de São Julião de Palácios e Deilão | 319   | 400   | 502   |
| União das freguesias de Sé, Santa Maria e Meixedo       | 22682 | 22016 | 20185 |

Source: Portuguese census: Statistics Portugal (INE), Recenseamento da população e habitação—Censos (2001, 2011, 2021).

**Table S2.** Resident Population—Vinhais Parishes

| Parish                                                | 2021 | 2011 | 2001 |
|-------------------------------------------------------|------|------|------|
| Edral                                                 | 171  | 198  | 225  |
| Paçó                                                  | 154  | 191  | 236  |
| Santalha                                              | 188  | 254  | 312  |
| Tuizelo                                               | 295  | 387  | 505  |
| União das freguesias de Moimenta e Montouto           | 218  | 278  | 349  |
| União das freguesias de Quirás e Pinheiro Novo        | 203  | 286  | 352  |
| União das freguesias de Sobreiro de Baixo e Alvaredos | 274  | 369  | 487  |
| União das freguesias de Soeira, Fresulfe e Mofreira   | 157  | 224  | 264  |
| União das freguesias de Travanca e Santa Cruz         | 148  | 171  | 191  |
| União das freguesias de Vilar de Lomba e São Jomil    | 207  | 237  | 267  |
| Vila Verde                                            | 151  | 186  | 240  |
| Vilar de Ossos                                        | 223  | 269  | 344  |
| Vilar Seco de Lomba                                   | 186  | 235  | 292  |
| Vinhais                                               | 2187 | 2245 | 2382 |

Source: Portuguese census: Statistics Portugal (INE), Recenseamento da população e habitação—Censos (2001, 2011, 2021).

**Table S3.** Population aged 65 years or over—Bragança Parishes

| Parish                                                  | 2021 | 2011 |
|---------------------------------------------------------|------|------|
| Babe                                                    | 110  | 108  |
| Baçal                                                   | 191  | 165  |
| Carragosa                                               | 54   | 62   |
| Castro de Avelãs                                        | 139  | 117  |
| Donai                                                   | 126  | 94   |
| Espinhosela                                             | 112  | 110  |
| França                                                  | 115  | 103  |
| Gimonde                                                 | 109  | 89   |
| Gondesende                                              | 66   | 82   |
| Parâmio                                                 | 80   | 96   |
| Quintanilha                                             | 128  | 103  |
| Rabal                                                   | 78   | 64   |
| União das freguesias de Aveleda e Rio de Onor           | 140  | 138  |
| União das freguesias de Castrelos e Carrazedo           | 108  | 106  |
| União das freguesias de São Julião de Palácios e Deilão | 178  | 198  |

Source: Portuguese census: Statistics Portugal (INE), Recenseamento da população e habitação—Censos (2011, 2021).

**Table S4.** Population aged 65 years or over- Vinhais Parishes

| Parish                                                | 2021 | 2011 |
|-------------------------------------------------------|------|------|
| Edral                                                 | 95   | 81   |
| Paçó                                                  | 60   | 73   |
| Santalha                                              | 103  | 123  |
| Tuizelo                                               | 157  | 175  |
| União das freguesias de Moimenta e Montouto           | 96   | 118  |
| União das freguesias de Quirás e Pinheiro Novo        | 127  | 160  |
| União das freguesias de Sobreiro de Baixo e Alvaredos | 117  | 141  |
| União das freguesias de Soeira, Fresulfe e Mofreita   | 80   | 112  |
| União das freguesias de Travanca e Santa Cruz         | 61   | 70   |
| União das freguesias de Vilar de Lomba e São Jomil    | 83   | 40   |
| Vila Verde                                            | 90   | 85   |
| Vilar de Ossos                                        | 79   | 90   |
| Vilar Seco de Lomba                                   | 105  | 57   |
| Vinhais                                               | 720  | 574  |

Source: Portuguese census: Statistics Portugal (INE), Recenseamento da população e habitação—Censos (2011, 2021).

**Table A5.** Population with tertiary education—Bragança Parishes

| Parish                                                  | 2021 | 2011 |
|---------------------------------------------------------|------|------|
| Babe                                                    | 19   | 20   |
| Baçal                                                   | 63   | 50   |
| Carragosa                                               | 13   | 11   |
| Castro de Avelãs                                        | 87   | 79   |
| Donai                                                   | 87   | 78   |
| Espinhosela                                             | 9    | 6    |
| França                                                  | 14   | 12   |
| Gimonde                                                 | 51   | 57   |
| Gondesende                                              | 8    | 12   |
| Parâmio                                                 | 9    | 3    |
| Quintanilha                                             | 32   | 33   |
| Rabal                                                   | 20   | 19   |
| União das freguesias de Aveleda e Rio de Onor           | 9    | 6    |
| União das freguesias de Castrelos e Carrazedo           | 9    | 10   |
| União das freguesias de São Julião de Palácios e Deilão | 11   | 19   |

Source: Portuguese census: Statistics Portugal (INE), Recenseamento da população e habitação—Censos (2011, 2021).

**Table S6.** Population with tertiary education—Vinhais Parishes

| Parish                                                | 2021 | 2011 |
|-------------------------------------------------------|------|------|
| Edral                                                 | 5    | 4    |
| Paçó                                                  | 9    | 9    |
| Santalha                                              | 5    | 8    |
| Tuizelo                                               | 18   | 15   |
| União das freguesias de Moimenta e Montouto           | 6    | 9    |
| União das freguesias de Quirás e Pinheiro Novo        | 6    | 8    |
| União das freguesias de Sobreiro de Baixo e Alvaredos | 18   | 21   |
| União das freguesias de Soeira, Fresulfe e Mofreira   | 4    | 6    |
| União das freguesias de Travanca e Santa Cruz         | 12   | 12   |
| União das freguesias de Vilar de Lomba e São Jomil    | 8    | 9    |
| Vila Verde                                            | 10   | 13   |
| Vilar de Ossos                                        | 11   | 17   |
| Vilar Seco de Lomba                                   | 10   | 10   |
| Vinhais                                               | 292  | 269  |

Source: Portuguese census: Statistics Portugal (INE), Recenseamento da população e habitação—Censos (2011, 2021).
